# Supplementary material
Source: PubMed Central journal article supplement (PMC6535981)
Supplement: Supp_Data.pdf [file Supp_Data.pdf]

## **SUPPLEMENTAL METHODS AND FIGURES**

### **Supplemental Methods**

#### ***Cell Culture***

The human induced pluripotent stem (hiPS) cell line WTC11 was kindly provided by Dr. Bruce Conklin (through a Material Transfer Agreement with Gladstone Institute of Cardiovascular Disease, UCSF). The hiPS cells were maintained in mTeSR 1 medium (Stem cell Technologies) supplemented with 100 U/mL penicillin and 100 µg/mL streptomycin at 37°C in a humidified incubator with room air and 5% CO<sub>2</sub>. The hiPS cells were continuously passaged at 60-70% confluency into 6 well plates and routinely checked for mycoplasma contamination. For the first 24h after passaging, culture medium was supplemented with 2 µM of Thiazovivin (Tocris 3845). The plates were coated with 1 mL of Growth Factor Reduced Matrigel (Corning 356231) diluted 1:80 in DMEM/F12 media prior to use.

hiPS cells were differentiated into cardiomyocytes using published methods routinely used in our laboratory.<sup>20</sup> Briefly, hiPSC cardiac differentiation was initiated at 90-95% confluency. Differentiation was achieved through addition of CDM3 (RPMI 1640 (ThermoFisher 11875093) supplemented with 213 µg/mL ascorbic acid (Wako Chemicals 321-44823), 500 µg/mL albumin (ScienCell OsrHSA), and 100 U/mL penicillin and 100 µg/mL streptomycin) supplemented with 3 µM CHIR 99021 (Tocris 4423) for two days, followed by CDM3 supplemented with 2 µM Wnt-C59 (Tocris 5148) for another two days. Media was continuously changed with CDM3 ever two days afterwards.

#### ***Bioreactor design***

A custom mold for the bioreactor was designed in SOLIDWORKS and manufactured out of polyoxymethylene using a computer numerical control (CNC) milling machine (Haas OM 2). Sylgard 184 Polydimethylsiloxane (PDMS) was mixed in a 10:1 ratio with Sylgard 184 curing agent, and poured into the custom mold. The molds were placed under vacuum to remove bubbles, and left to cure in the oven

at 60°C overnight. The subsequently formed reactors were washed and plasma bonded to a glass slide (75 x 50 mm).

### ***Bioreactor cultivation of cardiac constructs***

hiPS-CMs were dissociated from monolayers using 0.2% collagenase II (Worthington LS004177) in HBSS at 12-17 days after the start of differentiation. Prior to construct seeding, the construct formation wells were coated with 4% Pluronic F127 (Sigma P2443) for 30 minutes, washed, and then allowed to air dry for 30 minutes. Approximately  $25 \times 10^6$  hiPS-CMs/mL were encapsulated in collagen-fibrinogen hydrogel consisting of 1.5 mg/mL of rat tail collagen type I (Corning CB354249), 4 mg/mL bovine fibrinogen (Sigma F8630), and 10 units/mL thrombin (Sigma T7513). 120  $\mu$ L of the cell-hydrogel solution were placed into each well of the bioreactor to form a cardiac construct around the pillars. The constructs were cultured in RPMI 1640 medium (Thermofisher 11875) supplemented with 2% B27 (Thermofisher 17504044), 213  $\mu$ g/mL ascorbic acid (Wako Chemicals 321-44823), 100 U/mL penicillin and 100  $\mu$ g/mL streptomycin. Aprotinin (33  $\mu$ g/mL, Sigma A3428) was added to the media for the first 7 days of culture. Culture media was changed every two days, and constructs were analyzed after two weeks of culture. Relatively immature constructs were analyzed after three days of culture.

### ***Western blot preparation***

For western blot analysis, 3-4 constructs per group were pooled together, flash-frozen in liquid nitrogen, and then transferred to a -80°C freezer until they were ready for protein isolation. Constructs were homogenized using TissueRuptor II (Qiagen) in Tissue Protein Extraction Reagent (Thermofisher 78510) supplemented with 1X Protease/Phosphatase Inhibitor Cocktail (Cell Signaling Technology 5872S). The homogenized constructs were then placed on a vortex mixer at 4°C for 2 hours. Protein concentrations were then determined using a Pierce BCA protein assay kit (Thermofisher 23225), and 30  $\mu$ g of total protein were added to each lane.
