# Supplementary material
Source: PubMed Central journal article supplement (PMC6535981)
Supplement: Supp_Fig2.pdf [file Supp_Fig2.pdf]

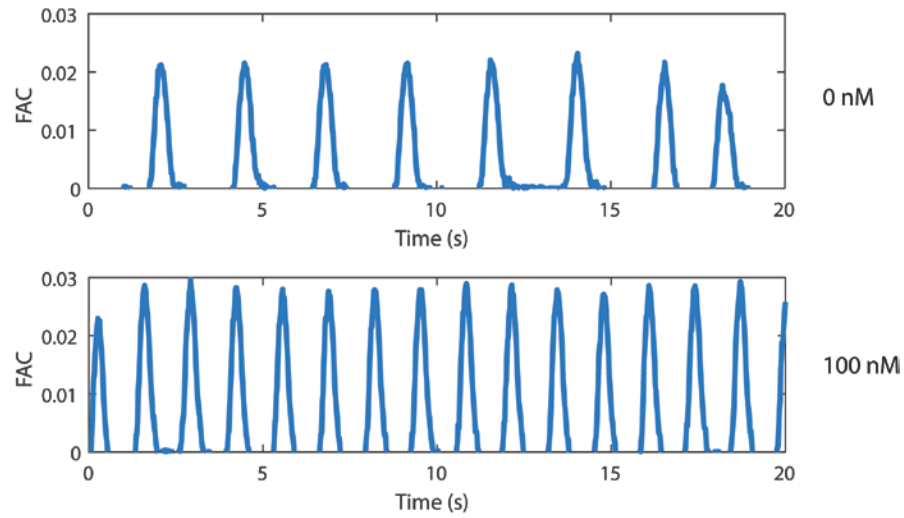

**Supplementary FIG. 2.**  $\beta$ -adrenergic stimulation of cardiac constructs. Representative fractional area change (FAC) traces of cardiac construct response to isoproterenol stimulation. Baseline (top) and 100 nM isoproterenol (bottom).
